# Supplementary material for: Cardiomyopathy related desmocollin-2 prodomain variants affect the intracellular cadherin transport and processing
Source: PubMed Central journal article supplement (PMC10235514; doi:10.3389/fcvm.2023.1127261), 2023-05-19
Supplement: Datasheet1.pdf [file Datasheet1.pdf]

## *Supplementary Material*

# **Cardiomyopathy related desmocollin-2 prodomain variants affect the intracellular cadherin transport and processing**

**Greta Marie Pohl<sup>1</sup>, Manuel Göz<sup>2</sup>, Anna Gärtner<sup>1</sup>, Andreas Brodehl<sup>1</sup>, Tolga Cimen<sup>3</sup>, Ardan M. Saguner<sup>3</sup>, Eric Schulze-Bahr<sup>4</sup>, Volker Walhorn<sup>2</sup>, Dario Anselmetti<sup>2</sup>, Hendrik Milting<sup>1\*</sup>**

**\* Correspondence:**

Prof. Dr. Hendrik Milting (PhD), Erich & Hanna Klessmann-Institute for Cardiovascular Research and Development, Heart- and Diabetes Center NRW, University Hospital of the Ruhr-University Bochum, Georgstr. 11, D-32545 Bad Oeynhausen, Germany.

[hmilting@hdz-nrw.de](mailto:hmilting@hdz-nrw.de), Phone: +49-(0)5731-97 3510





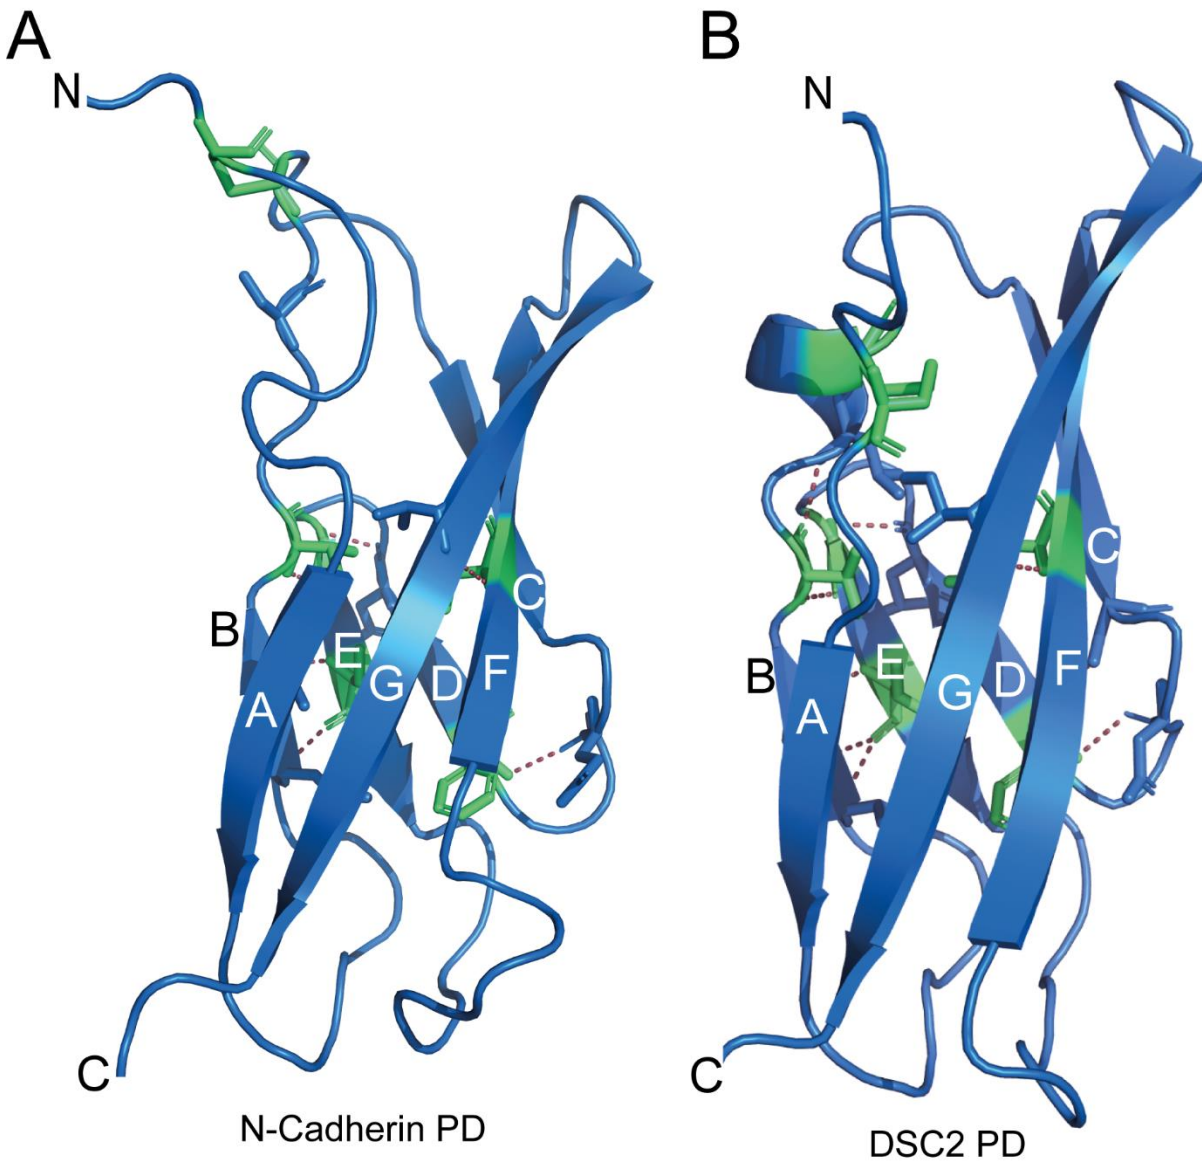

**Supplementary Figure 3.** (A) Ribbon presentation of the prodomain (PD) of the classical N-Cadherin (aa26-aa159) compared to the (B) *in silico* prediction of the wildtype DSC2 PD (aa28-aa135) (4, 5). Interacting and conserved amino acids (green) are shown as sticks. Polar contacts between amino acids from conserved positions are shown as red dashed lines. Designation of the  $\beta$ -sheets corresponds to those of Koch *et al.*, 2004 (6). N- and C-termini are indicated.

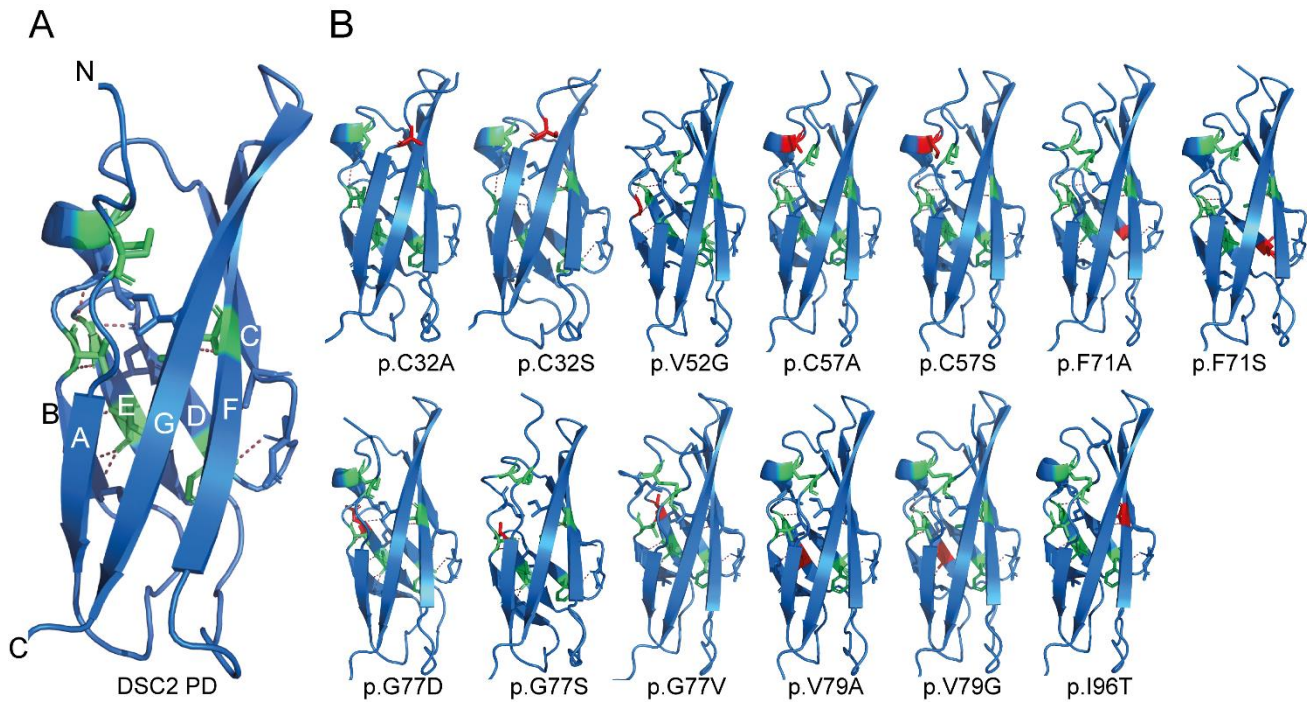

**Supplementary Figure 4.** Ribbon presentation of the *in silico* predictions of (A) the wildtype DSC2 prodomain (PD) (aa28-aa135) (4, 5). Designation of the  $\beta$ -sheets respond to those of Koch *et al.*, 2004 (6). N- and C-termini are indicated. (B) Predicted ribbon structures of different variants (red) at conserved positions (green) within the DSC2 PD (7) that affect subcellular plasma membrane localization. Polar contacts are shown as red dashed lines. Interacting amino acids from conserved positions are shown as sticks.

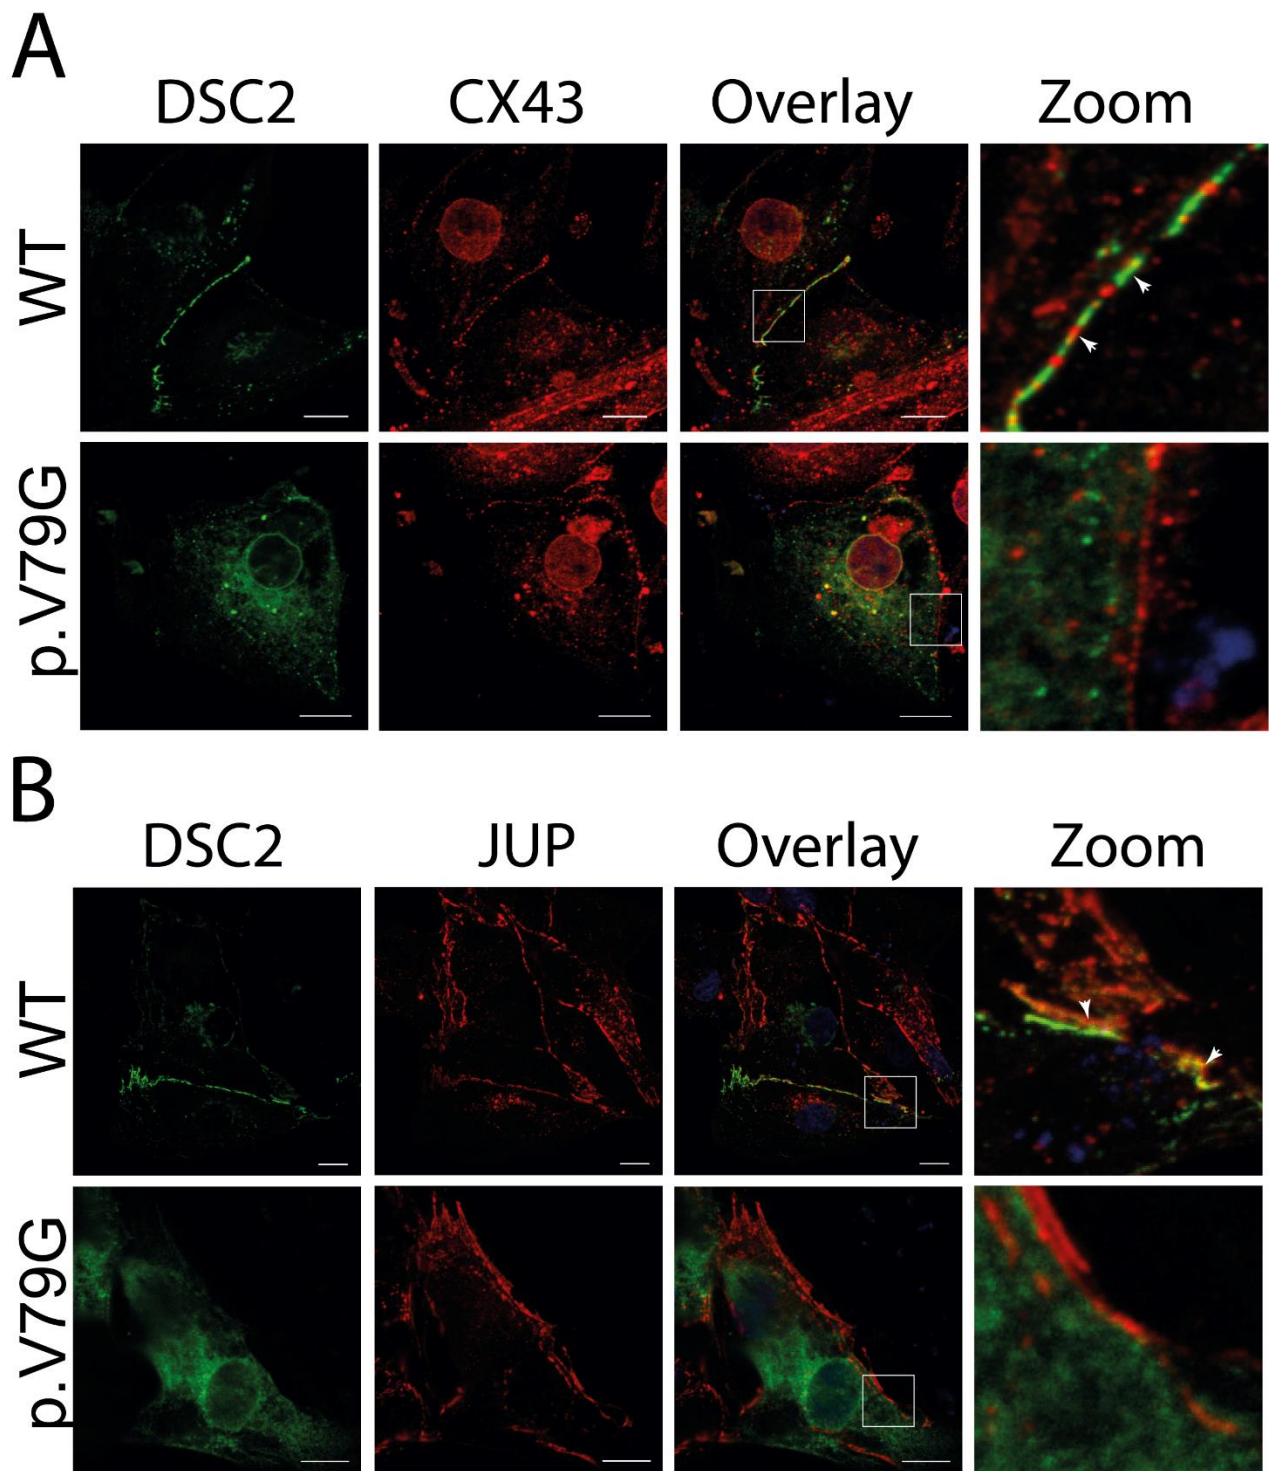

**Supplementary Figure 5.** Localization of (A) connexin-43 (CX43, #11370, 1:100 in 1% BSA/PBS, Abcam, red) and (B) plakoglobin (JUP, BD610253, 1:100 in 1% BSA/PBS, BD Biosciences, red) for DSC2 wildtype (WT, green) and a representative variant which is not properly localized at the plasma membrane (p.V79G) in human iPSC-derived cardiomyocytes (no ACTN2 staining). No *in vitro* influence on the localization of both, JUP and CX43, was observed for the variant p.V79G.

## 2 Supplementary Tables

**Supplementary Table 1:** Oligonucleotides that were used for site-directed mutagenesis in *DSC2*.

| Name     | Sequence [5'-.-.3']                                |
|----------|----------------------------------------------------|
| D30N_fwd | GCGATCTTAATATTTGCCAGTAATGCCTGCAAAAATGTGACAT        |
| D30N_rev | ATGTCACATTTTTGCAGGCATTACTGGCAAATATTAAGATCGC        |
| C32A_fwd | ATCTTAATATTTGCCAGTGATGCCGCCAAAATGTGACATTACATGTTCC  |
| C32A_rev | GGAACATGTAATGTCACATTTTTGGCGGCATCACTGGCAAATATTAAGAT |
| C32S_fwd | TTAATATTTGCCAGTGATGCCTCCAAAATGTGACATTACATGTTC      |
| C32S_rev | GAACATGTAATGTCACATTTTTGGAGGCATCACTGGCAAATATTAA     |
| V52A_fwd | CGAGAAACTTGTTGGTAGAGCTAACCTGAAAGAGTGCTTTA          |
| V52A_rev | TAAAGCACTCTTTCAGGTTAGCTCTACCAACAAGTTTCTCG          |
| V52I_fwd | CCGAGAAACTTGTTGGTAGAATTAACCTGAAAGAGTGCTTT          |
| V52I_rev | AAAGCACTCTTTCAGGTTAATTCTACCAACAAGTTTCTCGG          |
| V52G_fwd | CGAGAAACTTGTTGGTAGAGGTAACCTGAAAGAGTGCTTTA          |
| V52G_rev | TAAAGCACTCTTTCAGGTTACCTCTACCAACAAGTTTCTCG          |
| V52L_fwd | CGAGAAACTTGTTGGTAGACTTAACCTGAAAGAGTGCTT            |
| V52L_rev | AAGCACTCTTTCAGGTTAAGTCTACCAACAAGTTTCTCG            |
| C57A_fwd | TTGGTAGAGTTAACCTGAAAGAGGCCTTTACAGCTGCAAATCTAATTC   |
| C57A_rev | GAATTAGATTTGCAGCTGTAAAGGCCTCTTTCAGGTTAACTCTACCAA   |
| C57S_fwd | GTAGAGTTAACCTGAAAGAGTCCTTTACAGCTGCAAATCTAAT        |
| C57S_rev | ATTAGATTTGCAGCTGTAAAGGACTCTTTCAGGTTAACTCTAC        |

|          |                                                   |
|----------|---------------------------------------------------|
| F71Y_fwd | CAAATCTAATTCATTCAAGTGATCCTGACTACCAAATTTTGGAGGAT   |
| F71Y_rev | ATCCTCCAAAATTTGGTAGTCAGGATCACTTGAATGAATTAGATTTG   |
| F71A_fwd | TAATTCATTCAAGTGATCCTGACGCCCAAATTTTGGAGGATGGTTCAG  |
| F71A_rev | CTGAACCATCCTCCAAAATTTGGGCGTCAGGATCACTTGAATGAATTA  |
| F71S_fwd | CAAATCTAATTCATTCAAGTGATCCTGACTCCCAAATTTTGGAGGAT   |
| F71S_rev | ATCCTCCAAAATTTGGGAGTCAGGATCACTTGAATGAATTAGATTTG   |
| G77V_fwd | TGACTTCCAAAATTTTGGAGGATGTTTCAGTCTATAACAACAATACTA  |
| G77V_rev | TAGTATTTGTTGTATAGACTGAAACATCCTCCAAAATTTGGAAGTCA   |
| G77D_fwd | TGACTTCCAAAATTTTGGAGGATGATTCAGTCTATAACAACAATACTA  |
| G77D_rev | TAGTATTTGTTGTATAGACTGAATCATCCTCCAAAATTTGGAAGTCA   |
| G77S_fwd | CTGACTTCCAAAATTTTGGAGGATAGTTCAGTCTATAACAACAATACT  |
| G77S_rev | AGTATTTGTTGTATAGACTGAACTATCCTCCAAAATTTGGAAGTCAG   |
| V79G_fwd | ATAGAATAGTATTTGTTGTATAGCCTGAACCATCCTCCAAAATTTGG   |
| V79G_rev | CCAAAATTTTGGAGGATGGTTCAGGCTATAACAACAATACTATTCTAT  |
| V79A_fwd | CCAAAATTTTGGAGGATGGTTCAGCCTATAACAACAATACTATTCTAT  |
| V79A_rev | ATAGAATAGTATTTGTTGTATAGGCTGAACCATCCTCCAAAATTTGG   |
| V79I_fwd | ACTTCCAAAATTTTGGAGGATGGTTCAATCTATAACAACAATACTATTC |
| V79I_rev | GAATAGTATTTGTTGTATAGATTGAACCATCCTCCAAAATTTGGAAGT  |
| V79L_fwd | CTTCCAAAATTTTGGAGGATGGTTCCTCTATAACAACAATACTATT    |
| V79L_rev | AATAGTATTTGTTGTATAGAGTGAACCATCCTCCAAAATTTGGAAG    |



|                      |                                                                                                         |
|----------------------|---------------------------------------------------------------------------------------------------------|
| I96V_fwd             | CGGAGAAGAGAAGTTTTACCGTATTACTTTCCAACACTGAG                                                               |
| I96V_rev             | CTCAGTGTTGGAAAGTAATACGGTAAAACCTTCTCTTCTCCG                                                              |
| I96T_fwd             | CGGAGAAGAGAAGTTTTACCACATTACTTTCCAACACTGAGAA                                                             |
| I96T_rev             | TTCTCAGTGTTGGAAAGTAATGTGGTAAAACCTTCTCTTCTCCG                                                            |
| I96L_fwd             | CGGAGAAGAGAAGTTTTACCCTATTACTTTCCAACACTGAG                                                               |
| I96L_rev             | CTCAGTGTTGGAAAGTAATAGGGTAAAACCTTCTCTTCTCCG                                                              |
| I96A_fwd             | CTCGGAGAAGAGAAGTTTTACCGCATTACTTTCCAACACTGAGAAC                                                          |
| I96A_rev             | GTTCTCAGTGTTGGAAAGTAATGCGGTAAAACCTTCTCTTCTCCGAG                                                         |
| delSP_fwd<br>(pCEP4) | CGCCGCCACCATGGCCAGTGATGCCT                                                                              |
| delSP_rev<br>(pCEP4) | AGGCATCACTGGCCATGGTGGCGGCG                                                                              |
| delSP_fwd<br>(peYFP) | CTCAGATCTCGAGATGGCCAGTGATGCCTGCA                                                                        |
| delSP_rev<br>(peYFP) | TGCAGGCATCACTGGCCATCTCGAGATCTGAG                                                                        |
| delPD_fwd            | GCTGACCCTCGCGATCTTAATATTTAGATGGGCTCCAA                                                                  |
| delPD_rev            | TTGGAGCCCATCTAAATATTAAGATCGCGAGGGTCAGC                                                                  |
| Sec-PD_fwd           | ACTCAGATCTCGAGATGTGGTGGCGCCTGTGGTGGCTGCTGCTGCTGC<br>TGCTGCTGCTGTGGCCCATGGTGTGGGCCGCCAGTGATGCCTGC        |
| Sec-PD_rev           | GTGGCGACCGGTCCTCTC                                                                                      |
| Sec-<br>delPD_fwd    | ACTCAGATCTCGAGATGTGGTGGCGCCTGTGGTGGCTGCTGCTGCTGCTG<br>CTGCTGCTGTGGCCCATGGTGTGGGCCAGATGGGCTCCAATTCCTTGTC |

|               |                                                                                                   |
|---------------|---------------------------------------------------------------------------------------------------|
| Sec-delPD_rev | GTGGCGACCGGTCCTCTC                                                                                |
| Sec-D30N_fwd  | GTGTGGGCCCGCCAGTAATGCCTGCAAAAATG                                                                  |
| Sec-D30N_rev  | CATTTTTGCAGGCATTACTGGCGGCCACAC                                                                    |
| IgG-PD_fwd    | ACTCAGATCTCGAGATGGAGTTTGGACTGAGCTGGCTTTTTCTTGTGGCTT<br>TTTTAAAAGGTGTCCAGTGTGCCAGTGATGCCTGC        |
| IgG-PD_rev    | GTGGCGACCGGTCCTCTC                                                                                |
| IgG-delPD_fwd | ACTCAGATCTCGAGATGGAGTTTGGACTGAGCTGGCTTTTTCTTGTGGCTT<br>TTTTAAAAGGTGTCCAGTGTAGATGGGCTCCAATTCCTTGTC |
| IgG-delPD_rev | GTGGCGACCGGTCCTCTC                                                                                |
| IgG-D30N_fwd  | GTGTCCAGTGTGCCAGTAATGCCTGCAAAAATGTG                                                               |
| IgG-D30N_rev  | CACATTTTTGCAGGCATTACTGGCACACTGGACAC                                                               |

1. Madeira F, Pearce M, Tivey ARN, Basutkar P, Lee J, Edbali O, et al. Search and sequence analysis tools services from EMBL-EBI in 2022. *Nucleic Acids Res.* 2022;50(W1):W276-W9.
2. UniProt C. UniProt: the universal protein knowledgebase in 2021. *Nucleic Acids Res.* 2021;49(D1):D480-D9.
3. Teufel F, Almagro Armenteros JJ, Johansen AR, Gislason MH, Pihl SI, Tsirigos KD, et al. SignalP 6.0 predicts all five types of signal peptides using protein language models. *Nat Biotechnol.* 2022;40(7):1023-5.
4. Jumper J, Evans R, Pritzel A, Green T, Figurnov M, Ronneberger O, et al. Highly accurate protein structure prediction with AlphaFold. *Nature.* 2021;596(7873):583-9.
5. Varadi M, Anyango S, Deshpande M, Nair S, Natassia C, Yordanova G, et al. AlphaFold Protein Structure Database: massively expanding the structural coverage of protein-sequence space with high-accuracy models. *Nucleic Acids Res.* 2022;50(D1):D439-D44.
6. Koch AW, Farooq A, Shan W, Zeng L, Colman DR, Zhou MM. Structure of the neural (N-) cadherin prodomain reveals a cadherin extracellular domain-like fold without adhesive characteristics. *Structure.* 2004;12(5):793-805.
7. Mirdita M, Schutze K, Moriwaki Y, Heo L, Ovchinnikov S, Steinegger M. ColabFold: making protein folding accessible to all. *Nat Methods.* 2022.
